# Supplementary material for: Hecw controls oogenesis and neuronal homeostasis by promoting the liquid state of ribonucleoprotein particles
Source: PubMed Central journal article supplement (PMC8446043; doi:10.1038/s41467-021-25809-8), 2021-09-16
Supplement: 41467_2021_25809_MOESM4_ESM.pdf [file 41467_2021_25809_MOESM4_ESM.pdf]

## **Description of Additional Supplementary Files**

**Supplementary Movie 1** Live imaging of Me31B::GFP in wild type egg chambers.

**Supplementary Movie 2** Live imaging of Me31B::GFP in *HecwKO;Me31B::GFP* egg chambers.

**Supplementary Movie 3** Fusion of Me31B::GFP particles in wild type egg chambers.

**Supplementary Movie 4-5** Representative of FLIP analysis performed on Me31B::GFP in wild-type egg chambers.

**Supplementary Movie 6-7** Representative of FLIP analysis performed on Me31B::GFP in *HecwKO;Me31B::GFP* egg chambers.
